# Supplementary material for: Metabolomics of Artichoke Bud Extract in Spontaneously Hypertensive Rats
Source: PubMed Central journal article supplement — ACS Omega. 2021 Jul 12;6(29):18610–22. doi: 10.1021/acsomega.1c01135 (PMC8319930; doi:10.1021/acsomega.1c01135), 2021-07-12
Supplement: ao1c01135_si_001.pdf [file ao1c01135_si_001.pdf]

## Supporting information

### **Metabolomics of artichoke bud extract in spontaneously hypertensive rats**

Zhi-Bin Wang<sup>1,2</sup>, Shi-Long Jiang<sup>1,2</sup>, Shao-Bo Liu<sup>3</sup>, Jing-Bo Peng<sup>1,2</sup>, Shuo Hu<sup>4</sup>, Xu Wang<sup>1,2</sup>, Wei Zhuo<sup>1,2</sup>, Tong Liu<sup>1,2</sup>, Ji-Wei Guo<sup>1,2</sup>, Hong-Hao Zhou<sup>1,2</sup>, Zhi-Quan Yang<sup>5\*</sup>, Xiao-Yuan Mao<sup>1,2\*</sup> and Zhao-Qian Liu<sup>1,2\*</sup>

<sup>1</sup>Department of Clinical Pharmacology, Hunan Key Laboratory of Pharmacogenetics, and National Clinical Research Center for Geriatric Disorders, Xiangya Hospital, Central South University, Changsha 410008, P. R. China; <sup>2</sup>Institute of Clinical Pharmacology, Engineering Research Center for applied Technology of Pharmacogenomics of Ministry of Education, Central South University, Changsha 410078, P. R. China; <sup>3</sup>Department of Pharmacy, Xiangya Hospital, Central South University, Changsha, 410008, P. R. China; <sup>4</sup>Department of Nuclear Medicine and Key Laboratory of Biological Nanotechnology of National Health Commission, Xiangya Hospital, Central South University, Changsha 410008, P. R. China; <sup>5</sup>Department of Neurosurgery, Xiangya Hospital, Central South University, Changsha 410008, P. R. China.

To whom correspondence should be addressed: Professor Zhao-Qian Liu, Department of Clinical Pharmacology, Hunan Key Laboratory of Pharmacogenetics, Xiangya Hospital, Central South University, Changsha 410008; P. R. China. Tel: +86 731 89753845, Fax: +86 731 82354476, E-mail: [zqliu@csu.edu.cn](mailto:zqliu@csu.edu.cn).

Or Professor Xiao-Yuan Mao, Department of Clinical Pharmacology, Hunan Key Laboratory of Pharmacogenetics, Xiangya Hospital, Central South University, Changsha 410008; P. R. China. E-mail: [xiaoyuanm@csu.edu.cn](mailto:xiaoyuanm@csu.edu.cn).

Or Professor Zhi-Quan Yang, Department of Neurosurgery, Xiangya Hospital, Central South University, Changsha 410008, P. R. China. E-mail: [y66406914@163.com](mailto:y66406914@163.com).

## **Supporting Information**

The toxicity assessment of ABE; log<sub>2</sub> fold changes of metabolites level mapped onto the KEGG pathway module; the chromatograms of artichoke bud extract that used in this study and the standards (chlorogenic acid, cynarin); chemical structures of active components contained in ABE; sequences of primers used for qRT-PCR.

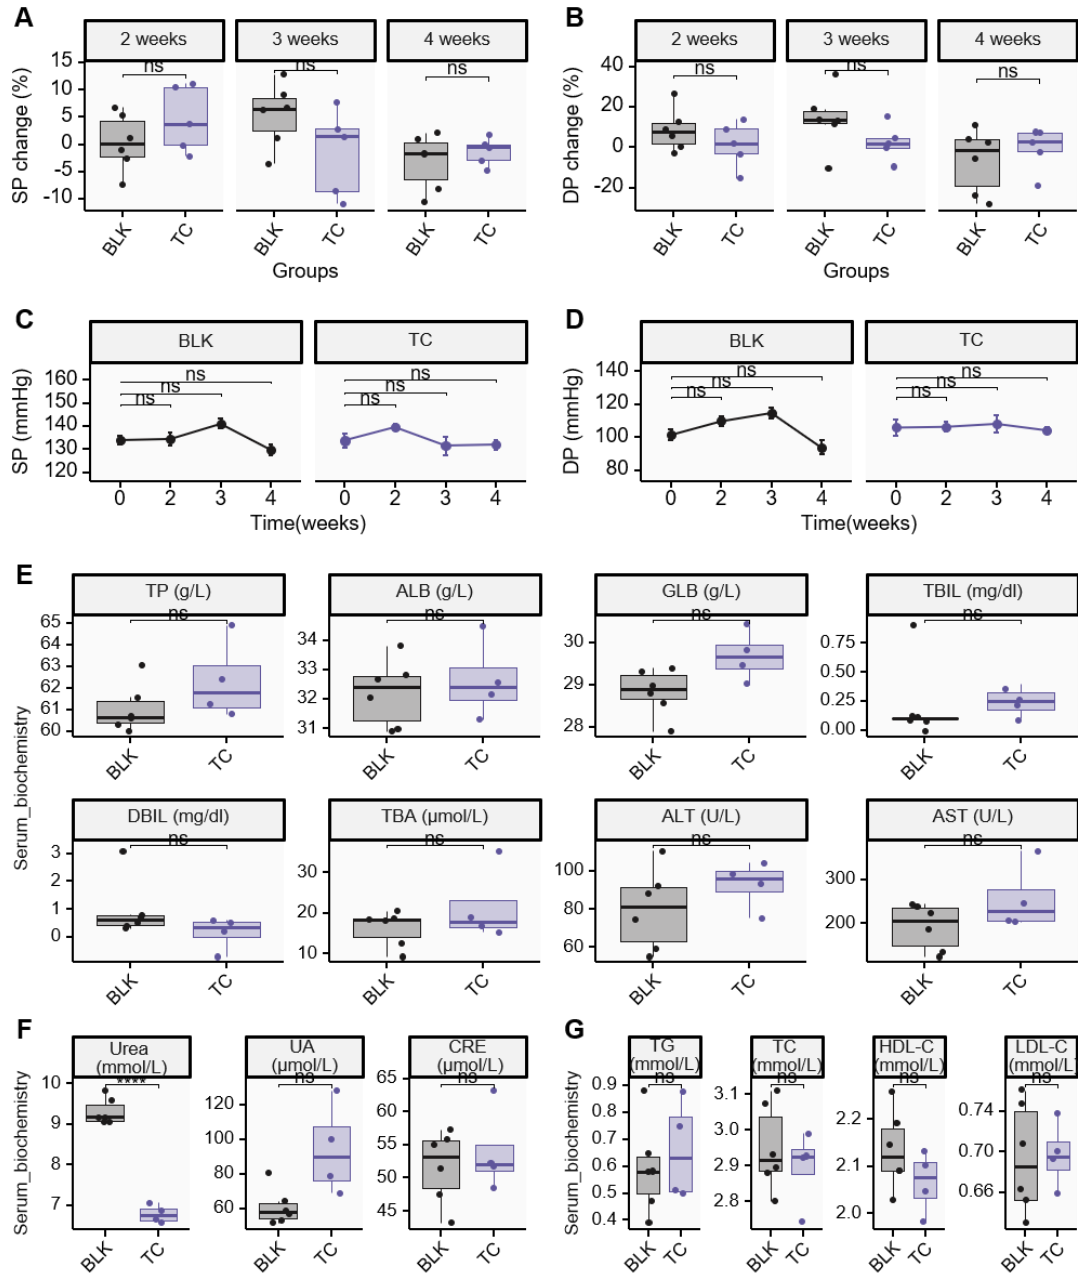

**Figure S1 Toxicity assessment of ABE.** SP change (A) and DP change (B) compared to 0 week of each rat in different groups. SP (C) and DP (D) trend along with time in different groups. n(BLK)=6; n(TC)=5. ns,  $P \geq 0.05$ ; \* $P < 0.05$ ; \*\* $P < 0.01$ ; \*\*\* $P < 0.001$ ; \*\*\*\* $P < 0.0001$  (ANOVA with repeated measurements). Effect of ABE on the serum biochemical parameters of WKY rats liver function (E), kidney function (F) and serum lipid profile (G). The bars at each data point in C and D indicate standard deviation. SP, Systolic blood pressure; DP, diastolic blood pressure; BLK, blank; TC, toxicity control, 50 mg/kg/d artichoke bud extract; TP, total protein; ALB, albumin; GLB, globulin; TBIL, total bilirubin; DBIL, direct bilirubin; TBA, total bile acids; ALT, alanine aminotransferase; AST, aspartate aminotransferase; UA, uric acid; CRE, creatinine; TG, triglyceride; TC, cholesterol; HDL-C, high-density lipoprotein cholesterol c; LDL-C, low-density lipoprotein cholesterol c.

A

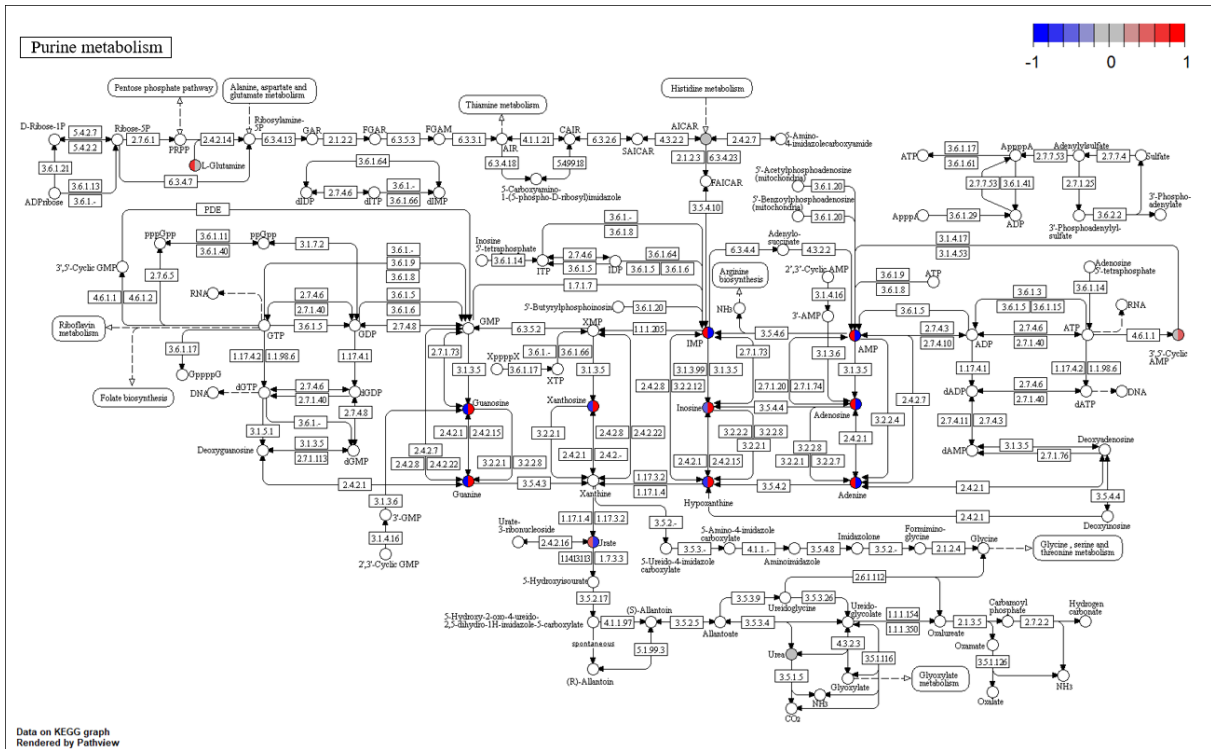

B

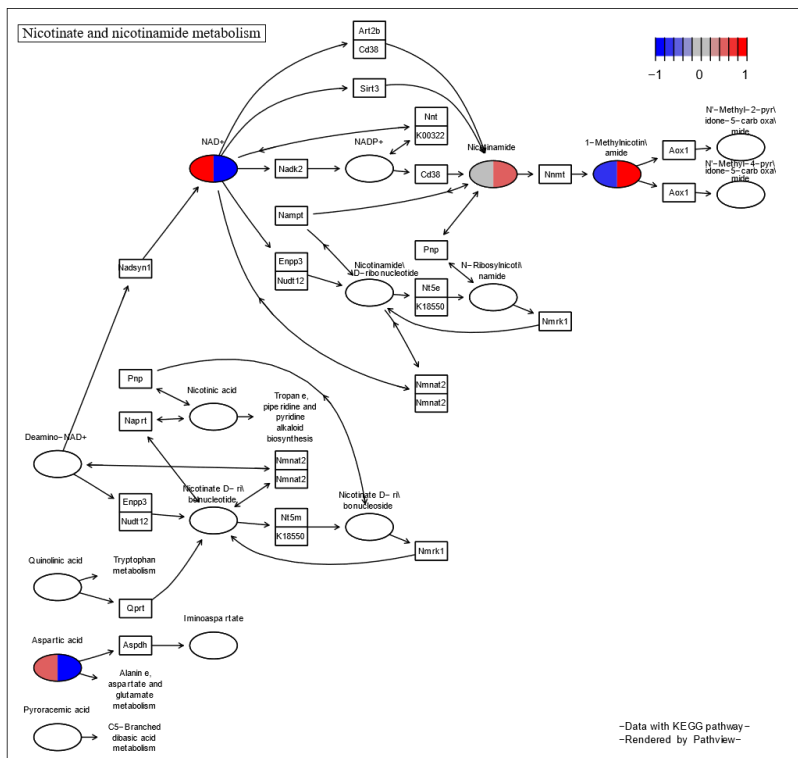

**Figure S2 Log<sub>2</sub> fold changes of metabolites level mapped onto the KEGG pathway module (A) “Purine metabolism” and (B) “Nicotinate and nicotinamide metabolism” by R package “Pathview”. Left half of circle, Group HPM vs. Group BLK; right half of circle, Group ABE\_a vs. Group HPM.**

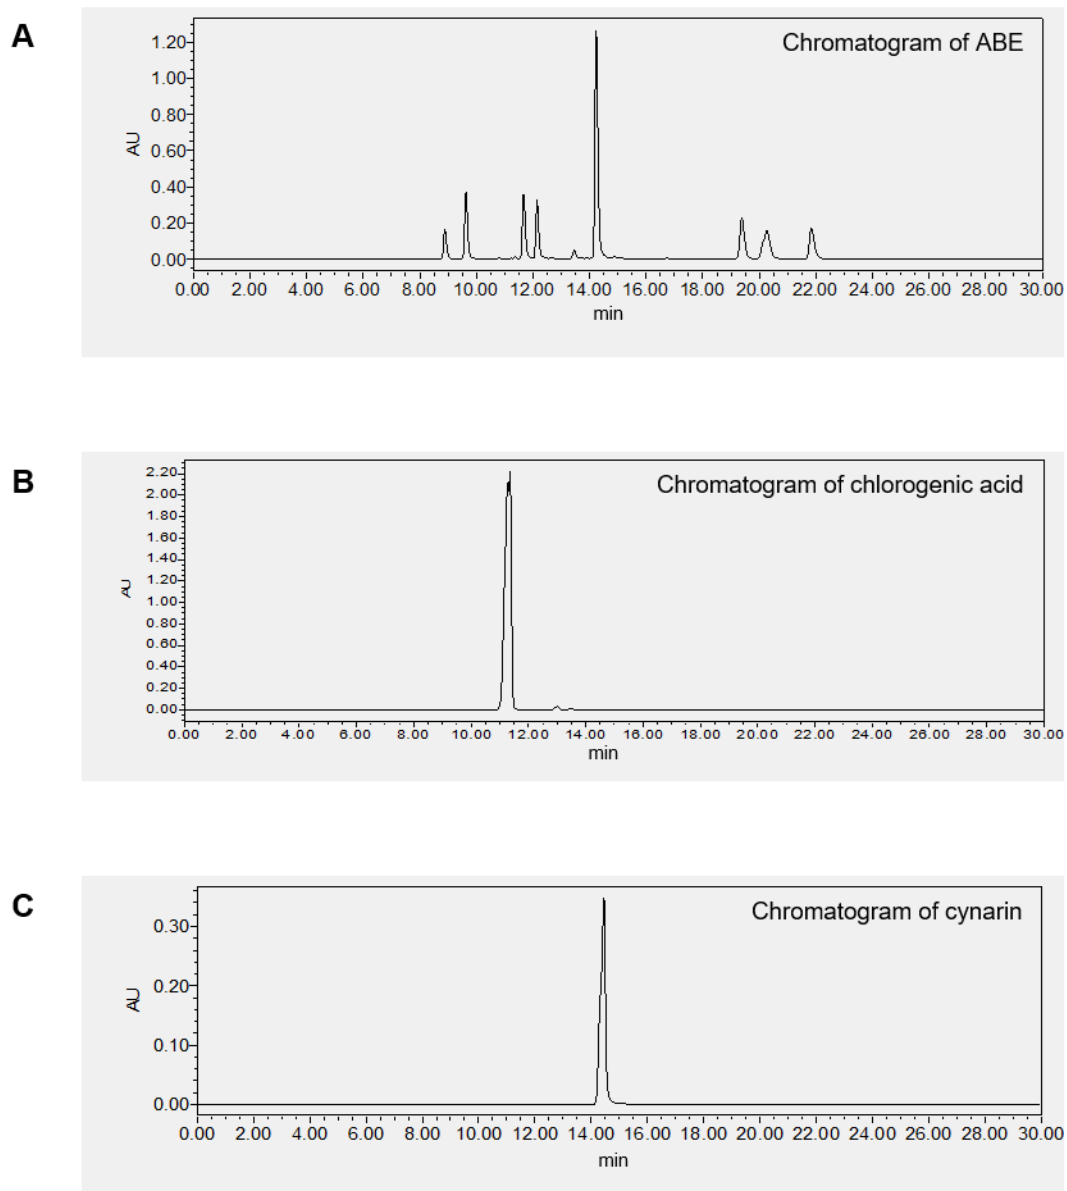

**Figure S3** The chromatograms (UV 330 nm) of artichoke bud extract that used in this study (A) and the standards (B for chlorogenic acid, C for cynarin).

**A**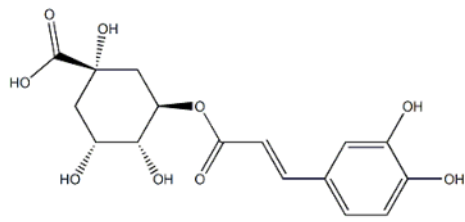

Chlorogenic acid

**B**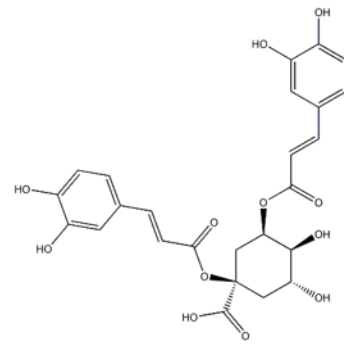

Cynarin

**Figure S4 Chemical structures of active components contained in ABE. A for chlorogenic acid, B for cynarin.**

**Table S1 Sequences of primers used for qRT-PCR.**

| Name              | Direction | Sequence (5'-3')       |
|-------------------|-----------|------------------------|
| <i>Actb</i> -rat  | Forward   | GGGAAATCGTGCGTGACATT   |
|                   | Reverse   | GCGGCAGTGGCCATCTC      |
| <i>Prdx2</i> -rat | Forward   | CTTCGCCAGATCACAGTCAA   |
|                   | Reverse   | ATACTGAAAGGCCTGGACGA   |
| <i>Sod2</i> -rat  | Forward   | ATTAACGCGCAGATCATGCA   |
|                   | Reverse   | CCTCGGTGACGTTGAGATTGT  |
| <i>Gpx4</i> -rat  | Forward   | GCCGTCTGAGCCGCTTATT    |
|                   | Reverse   | ACGCAACCCCTGTACTTATCCA |
| <i>Gsr</i> -rat   | Forward   | ACTTCTCACCCCAGTTGCG    |
|                   | Reverse   | CCACGGTAGGGATGTTGTCA   |
